1 **Identification of a novel tedizolid resistance mutation in *rpoB* of methicillin-resistant**

2 ***Staphylococcus aureus***

3

4 Tianwei Shen<sup>1</sup>, Kelsi Penewit<sup>2</sup>, Adam Waalkes<sup>2</sup>, Libin, Xu<sup>1</sup>, Stephen J. Salipante<sup>2</sup>, Abhinav

5 Nath<sup>1</sup>, Brian J. Werth<sup>3#</sup>

6

7 1 Department of Medicinal Chemistry, School of Pharmacy, University of Washington, Seattle,

8 WA, USA

9 2 Department of Laboratory Medicine, School of Medicine, University of Washington, Seattle,

10 WA, USA

11 3 Department of Pharmacy, School of Pharmacy, University of Washington, Seattle, WA, USA

12

13

14

15

16 # Corresponding author: Brian J. Werth, PharmD  
17 Associate Professor, Dept. of Pharmacy  
18 University of Washington  
19 School of Pharmacy  
20 1959 NE Pacific St., HSB H-375  
21 BOX 357630  
22 Seattle, WA 98195-7630  
23

24 **Abstract**

25           A tedizolid-resistant isolate of MRSA was selected by serial passage. Whole genome  
26 sequencing revealed only a single nucleotide variant in *rpoB*. Cross-resistance to linezolid,  
27 chloramphenicol, and quinupristin-dalfopristin was observed but susceptibility to other drugs  
28 including rifampin was unchanged. Models of the RNA-polymerase-ribosomal complex revealed  
29 that the mutated residue was unlikely to interact directly with the oxazolidinone binding site. This  
30 is the first time that *rpoB* mutation has been associated with resistance to the PhLOPSa  
31 antimicrobials.

32 Tedizolid is an oxazolidinone antimicrobial with broad spectrum activity against Gram-  
33 positive bacteria including methicillin-resistant *S. aureus* (MRSA).<sup>1</sup> Like other oxazolidinones  
34 tedizolid exerts its antibacterial activity by binding the 23s rRNA component of the 50s-  
35 ribosomal subunit and thus inhibiting protein synthesis. Resistance to tedizolid is uncommon but  
36 mutations in the ribosomal proteins L3, L4, and L22 (encoded by *rpIC*, *rpID*, and *rpIV*  
37 respectively), and the 23S rRNA target, which also mediate the so-called PhLOPSa (phenicol,  
38 lincosamide, oxazolidinone, pleuromutilin, and streptogramin A) resistance phenotype have  
39 been implicated.<sup>2,3</sup> Acquisition of the transferable rRNA methyltransferase gene, *cfi*, may also  
40 cause resistance to linezolid and other PhLOPSa antimicrobials but is generally believed to be  
41 insufficient to produce tedizolid resistance on its own even though it may increase the tedizolid  
42 MIC. The plasmid-carried *optrA* gene, which encodes an ABC transporter, has been implicated  
43 in oxazolidinone and phenicol resistance in enterococci and streptococci but has not been  
44 identified in *S. aureus*.<sup>4</sup> Previous serial passage studies with tedizolid have seen limited success  
45 in selecting for tedizolid resistance and only mutations in the 23S rRNA have been recovered  
46 following tedizolid exposure.<sup>5</sup> Genes affecting quinolone efflux such as *norA* and *mepA*, or  
47 lincosamide efflux such as *mdeA* have not been reported to affect oxazolidinone activity.

48 In this study, we observed the emergence of a mutant exhibiting a novel mechanism of  
49 PhLOPSa resistance from a well characterized MRSA strain after serial passage in escalating  
50 concentrations of tedizolid.

51 Using the well characterized MRSA strain, N315, we selected for tedizolid resistance by  
52 serial passage in escalating concentrations of tedizolid in Mueller Hinton II broth (MHB) starting  
53 with 0.5x the MIC. Once visible growth was observed a sample of the broth was diluted 1:1000  
54 into fresh MHB with twice the previous concentration of tedizolid until an isolate with an MIC of  
55  $\geq 4$  mg/mL was recovered. This MIC was selected since it is 1  $\log_2$  dilution above the breakpoint  
56 for resistance (MIC  $\geq 2$ mg/L). After 10 passages, we recovered an isolate (N315-TDZ4) with a  
57 stable tedizolid MIC of 4mg/L or 16x the MIC of the parent strain, N315. To explore the cross

58 resistance associated with this evolved strain we reevaluated susceptibility to a panel of other  
59 antimicrobial agents (Table 1) by broth microdilution in accordance with Clinical Laboratory  
60 Standards Institute (CLSI) guidelines<sup>6</sup> or by gradient strip in the case of quinupristin-dalfopristin  
61 (Liofilchem®). Cross-resistance to chloramphenicol, linezolid, and quinupristin-dalfopristin was  
62 observed but susceptibility to other drugs tested was relatively unchanged (Table 1). N315 is  
63 resistant to clindamycin so lincosamide cross-resistance was unevaluable in this study and we  
64 did not have access to pleuromutilins, which are not yet a clinically important class of  
65 antimicrobials. While macrolide susceptibility is not considered part of the PhLOPSa group  
66 macrolides also target the 50s ribosome, however, erythromycin susceptibility was also  
67 unevaluable since N315 is resistant to erythromycin at baseline.

68 N315-TDZ4 was subjected to whole genome sequencing (WGS) using the MiSeq  
69 platform (Illumina, San Diego, CA, USA) as previously described<sup>7</sup> to an average read depth of at  
70 least 50X per isolate and the. Sequence data from this study is freely available through the  
71 NCBI Sequence Read Archive ([PRJNA578164](https://www.ncbi.nlm.nih.gov/sra/PRJNA578164)). WGS of the N315-TDZ4 and comparison to the  
72 parent strain revealed a single nucleotide variant (SNV) in the *rpoB* gene (1345 A>G)  
73 corresponding to the amino acid substitution Asn449Asp. This mutation lies outside of the  
74 rifampin resistance-determining regions, which span from nucleotides 1384 – 1464 (AA 462–  
75 488) and 1543 – 1590 (AA 462–488)<sup>8,9</sup>, and we correspondingly did not observe any change in  
76 rifampin susceptibility (Table 1). Previous studies have reported an association between  
77 vancomycin and daptomycin susceptibility and certain *rpoB* mutations including Ala621Glu, and  
78 Ala477Asp, and His481Tyr.<sup>10-12</sup> We did not observe any change in daptomycin MIC for our  
79 mutant but we did see a 1 log<sub>2</sub>-dilution increase in vancomycin MIC. To further assess the  
80 potential significance of this increase in vancomycin MIC we tested the N315-TDZ4 isolate and  
81 N315 parent strains for the heterogeneous vancomycin intermediate *S. aureus* (hVISA)  
82 phenotype by the gold standard population analysis profile (PAP) as previously described.<sup>13</sup>  
83 Interestingly, we observed that PAP-AUC ratio with Mu3 of N315-TDZ4 was 0.85, up from 0.44

84 of the parent strain N315 (Table 1). While this increase is substantial it falls below the  
85 categorical criterion to declare this isolate an hVISA (PAP AUC ratio with Mu3 of  $\geq 0.9$ ).

86 In an effort to evaluate the potential impact of the *rpoB* Asn449Asp mutation on target  
87 protein function, we constructed a homology model of *S. aureus* *rpoB* using I-TASSER,<sup>14</sup> and  
88 modeled the relative orientations of the RNA polymerase (RNAP) and the ribosome (Figure 1).  
89 This model suggests that the RNAP mutation would be unlikely to interact directly with binding  
90 sites for the oxazolidinones and other PhLOPSa drugs located in the 50S ribosomal subunit  
91 (Figure 1). This finding suggests an indirect mechanism of resistance, possibly involving one of  
92 the many factors that interact with the beta-subunit of RNAP.<sup>8</sup>

93 In this study, we report for the first time a novel mechanism of resistance to  
94 oxazolidinones, phenicols, and streptogramins involving mutation in *rpoB*, which encodes the  $\beta$ -  
95 subunit of RNAP. The precise molecular mechanism by which this mutation mediates this  
96 resistance phenotype is unclear but may involve transcriptional modulation by altered sigma-  
97 factor binding. Previous studies have demonstrated that the 30s-ribosomal protein S10 encoded  
98 by *rpsJ* links directly with the  $\beta$ -subunit of RNAP facilitating the tight linkage between  
99 transcription and translation in bacteria but the RNAP only interacts with the leading 30s-subunit  
100 and no known interaction between the 50s subunits and the RNAP exist. The fact that cross  
101 resistance was isolated to 50s-ribosomally active agents and not 30s active agents  
102 (doxycycline) suggests a relatively specific interaction with the 50s-ribosome and not a broader  
103 modulation of translation or protein synthesis. Based on the absence of altered susceptibility to  
104 other intracellularly active agents including moxifloxacin and doxycycline it seems unlikely that  
105 this variant facilitates multidrug efflux. For now, tedizolid resistance remains uncommon  
106 clinically and it is unknown whether this unique mutation could be selected for by other  
107 PhLOPSa drugs or would be likely to emerge after clinical exposure to tedizolid.

108

109 **Acknowledgments**

110 This study was initially presented in part at the annual ID-Week conference in San Francisco,  
111 CA 2018. This study was supported in part by National Institute of Allergy and Infectious  
112 Diseases of the National Institutes of Health under the award numbers 1R21AI132994-01A1,  
113 1R01AI136979-01 and by the University of Washington.

114

115

## 116 References

- 117 1. Kisgen JJ, Mansour H, Unger NR, Childs LM. Tedizolid: a new oxazolidinone  
118 antimicrobial. *American journal of health-system pharmacy : AJHP : official journal of the*  
119 *American Society of Health-System Pharmacists.* 2014;71(8):621-33. doi: 10.2146/ajhp130482.  
120 PubMed PMID: 24688035.
- 121 2. Shaw KJ, Poppe S, Schaadt R, Brown-Driver V, Finn J, Pillar CM, Shinabarger D,  
122 Zurenko G. In vitro activity of TR-700, the antibacterial moiety of the prodrug TR-701, against  
123 linezolid-resistant strains. *Antimicrob Agents Chemother.* 2008;52(12):4442-7. doi:  
124 10.1128/AAC.00859-08. PubMed PMID: 18838596; PMCID: PMC2592863.
- 125 3. Freitas AR, Dilek AR, Peixe L, Novais C. Dissemination of *Staphylococcus epidermidis*  
126 ST22 With Stable, High-Level Resistance to Linezolid and Tedizolid in the Greek-Turkish  
127 Region (2008-2016). *Infect Control Hosp Epidemiol.* 2018;39(4):492-4. doi: 10.1017/ice.2018.5.  
128 PubMed PMID: 29427999.
- 129 4. Wang Y, Lv Y, Cai J, Schwarz S, Cui L, Hu Z, Zhang R, Li J, Zhao Q, He T, Wang D,  
130 Wang Z, Shen Y, Li Y, Fessler AT, Wu C, Yu H, Deng X, Xia X, Shen J. A novel gene, *optrA*,  
131 that confers transferable resistance to oxazolidinones and phenicols and its presence in  
132 *Enterococcus faecalis* and *Enterococcus faecium* of human and animal origin. *J Antimicrob*  
133 *Chemother.* 2015;70(8):2182-90. doi: 10.1093/jac/dkv116. PubMed PMID: 25977397.
- 134 5. Locke JB, Hilgers M, Shaw KJ. Novel ribosomal mutations in *Staphylococcus aureus*  
135 strains identified through selection with the oxazolidinones linezolid and torezolid (TR-700).  
136 *Antimicrob Agents Chemother.* 2009;53(12):5265-74. doi: 10.1128/AAC.00871-09. PubMed  
137 PMID: 19752277; PMCID: PMC2786364.
- 138 6. Clinical and Laboratory Standards Institute. *Performance Standards for Antimicrobial*  
139 *Susceptibility Testing: Twenty-fifth Informational Supplement M100-S27* CLSI, Wayne, PA.  
140 USA2017.
- 141 7. Roach DJ, Burton JN, Lee C, Stackhouse B, Butler-Wu SM, Cookson BT, Shendure J,  
142 Salipante SJ. A Year of Infection in the Intensive Care Unit: Prospective Whole Genome  
143 Sequencing of Bacterial Clinical Isolates Reveals Cryptic Transmissions and Novel Microbiota.  
144 *PLoS Genet.* 2015;11(7):e1005413. doi: 10.1371/journal.pgen.1005413. PubMed PMID:  
145 26230489; PMCID: PMC4521703.
- 146 8. Alifano P, Palumbo C, Pasanisi D, Tala A. Rifampicin-resistance, *rpoB* polymorphism  
147 and RNA polymerase genetic engineering. *J Biotechnol.* 2015;202:60-77. doi:  
148 10.1016/j.jbiotec.2014.11.024. PubMed PMID: 25481100.
- 149 9. Zhou W, Shan W, Ma X, Chang W, Zhou X, Lu H, Dai Y. Molecular characterization of  
150 rifampicin-resistant *Staphylococcus aureus* isolates in a Chinese teaching hospital from Anhui,  
151 China. *BMC microbiology.* 2012;12:240. doi: 10.1186/1471-2180-12-240. PubMed PMID:  
152 23082766; PMCID: PMC3485161.
- 153 10. Cui L, Isii T, Fukuda M, Ochiai T, Neoh HM, Camargo IL, Watanabe Y, Shoji M,  
154 Hishinuma T, Hiramatsu K. An RpoB mutation confers dual heteroresistance to daptomycin and  
155 vancomycin in *Staphylococcus aureus*. *Antimicrob Agents Chemother.* 2010;54(12):5222-33.  
156 doi: 10.1128/AAC.00437-10. PubMed PMID: 20837752; PMCID: PMC2981288.
- 157 11. Baek KT, Thogersen L, Mogenssen RG, Mellergaard M, Thomsen LE, Petersen A, Skov  
158 S, Cameron DR, Peleg AY, Frees D. Stepwise decrease in daptomycin susceptibility in clinical  
159 *Staphylococcus aureus* isolates associated with an initial mutation in *rpoB* and a compensatory  
160 inactivation of the *clpX* gene. *Antimicrob Agents Chemother.* 2015;59(11):6983-91. doi:  
161 10.1128/AAC.01303-15. PubMed PMID: 26324273; PMCID: PMC4604412.
- 162 12. Watanabe Y, Cui L, Katayama Y, Kozue K, Hiramatsu K. Impact of *rpoB* mutations on  
163 reduced vancomycin susceptibility in *Staphylococcus aureus*. *J Clin Microbiol.* 2011;49(7):2680-  
164 4. doi: 10.1128/JCM.02144-10. PubMed PMID: 21525224; PMCID: PMC3147882.

- 165 13. Wootton M, Howe RA, Hillman R, Walsh TR, Bennett PM, MacGowan AP. A modified  
166 population analysis profile (PAP) method to detect hetero-resistance to vancomycin in  
167 *Staphylococcus aureus* in a UK hospital. *J Antimicrob Chemother.* 2001;47(4):399-403. Epub  
168 2001/03/27. PubMed PMID: 11266410.
- 169 14. Yang J, Zhang Y. Protein Structure and Function Prediction Using I-TASSER. *Curr*  
170 *Protoc Bioinformatics.* 2015;52:5 8 1-15. doi: 10.1002/0471250953.bi0508s52. PubMed PMID:  
171 26678386; PMCID: PMC4871818.
- 172
- 173



174

| <b>Table 1</b>                   | <b>MIC (mg/L)</b> |                  |                                    | <b>Target</b>            |
|----------------------------------|-------------------|------------------|------------------------------------|--------------------------|
| <b>Drug</b>                      | <b>N315</b>       | <b>N315-TDZ4</b> | <b>Log<sub>2</sub> Fold Change</b> | --                       |
| <b>Chloramphenicol</b>           | <b>8</b>          | <b>128</b>       | <b>4</b>                           | 50s ribosome             |
| <b>Daptomycin</b>                | 0.25              | 0.25             | 0                                  | Cell membrane            |
| <b>Doxycycline</b>               | 0.125             | 0.125            | 0                                  | 30s ribosome             |
| <b>Linezolid</b>                 | <b>2</b>          | <b>8</b>         | <b>2</b>                           | 50s ribosome             |
| <b>Moxifloxacin</b>              | 0.0625            | 0.0625           | 0                                  | DNA gyrase/topoisomerase |
| <b>Quinupristin-dalfopristin</b> | 0.38              | 2                | <b>2</b>                           | 50s ribosome             |
| <b>Rifampin</b>                  | 0.001             | 0.001            | 0                                  | RNA polymerase           |
| <b>Tedizolid</b>                 | <b>0.25</b>       | <b>4</b>         | <b>4</b>                           | 50s ribosome             |
| <b>Vancomycin</b>                | <b>0.5</b>        | <b>1</b>         | <b>1</b>                           | Cell wall synthesis      |
| <b>-PAP AUC ratio with Mu3</b>   | <b>0.44</b>       | <b>0.85</b>      | <b>---</b>                         |                          |

175

176 Table 1. Minimum inhibitory concentrations (MIC) of parent strain, N315, and tedizolid passaged  
 177 *rpoB* mutant, N315-TDZ4 to various antimicrobials, including fold change in MIC and  
 178 antimicrobial target. PAP, population analysis profile; AUC, area under the cure

179

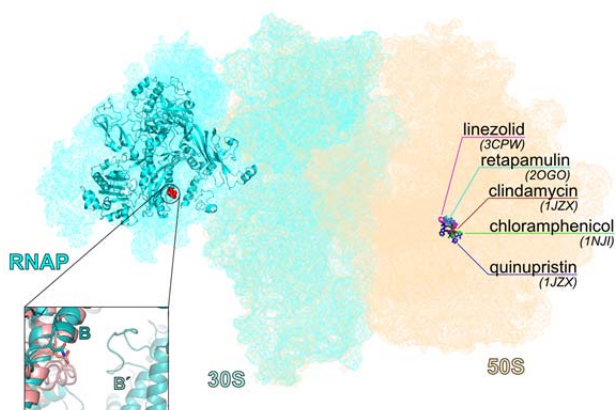

180

181 **Figure 1. Model of *S. aureus* rpoB N449D docked into the RNA polymerase (RNAP)-**  
182 **ribosome transcriptional complex (protein data bank, IDs 5MY1 and 5U9F), illustrating**  
183 **that the mutated residue in RNAP lies ~170Å from the binding site of PHLOPSa drugs on**  
184 **the 50S ribosomal subunit. Drug binding sites are drawn from the PDB IDs indicated in**  
185 **parentheses. The great distance between the mutated residue and linezolid binding site**  
186 **suggests an indirect mechanism; notably, the susceptibility of doxycycline, which acts**  
187 **on the 30S ribosomal subunit, was not affected. One CryoEM study of the structure of the**  
188 **RNAP-ribosomal complex indicates an S1 protein crosslink between the 30S and RNAP**  
189 **at the helix-turn-helix affected by this mutation.**

190

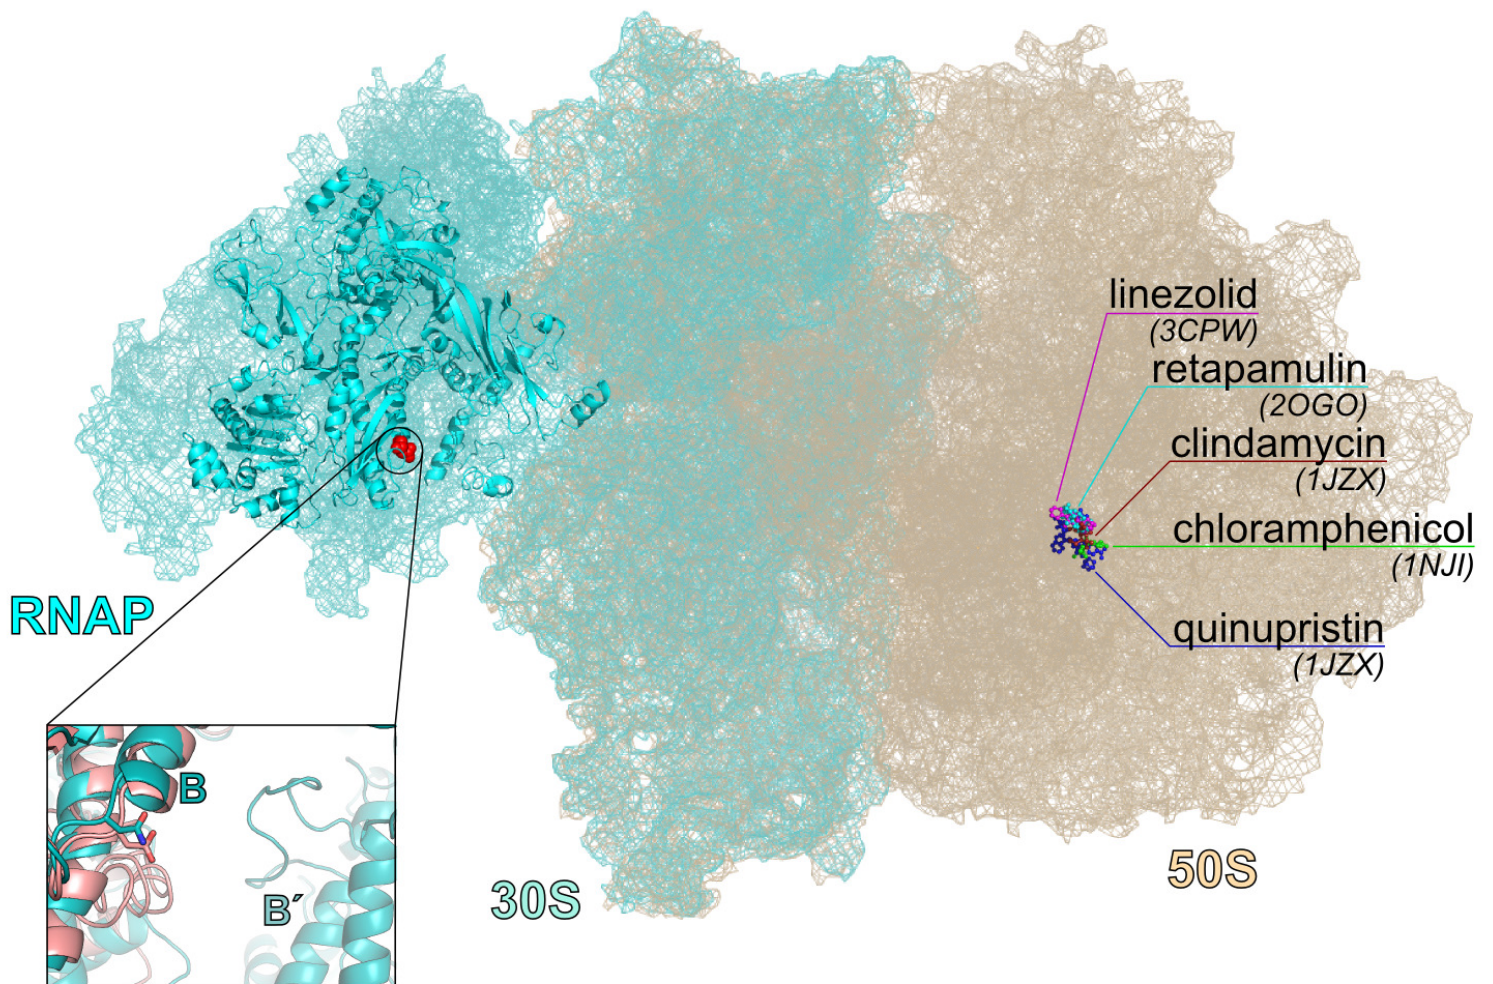

Source: https://www.biorxiv.org/content/10.1101/827501v1.full.pdf
